# Supplementary material for: Analytical Performance and Greenness Evaluation of Five Multi-Level Design Models Utilized for Impurity Profiling of Favipiravir, a Promising COVID-19 Antiviral Drug
Source: MDPI journal article supplement (doi:10.3390/molecules27123658), 2022-06-07
Supplement: s1 [file s1]

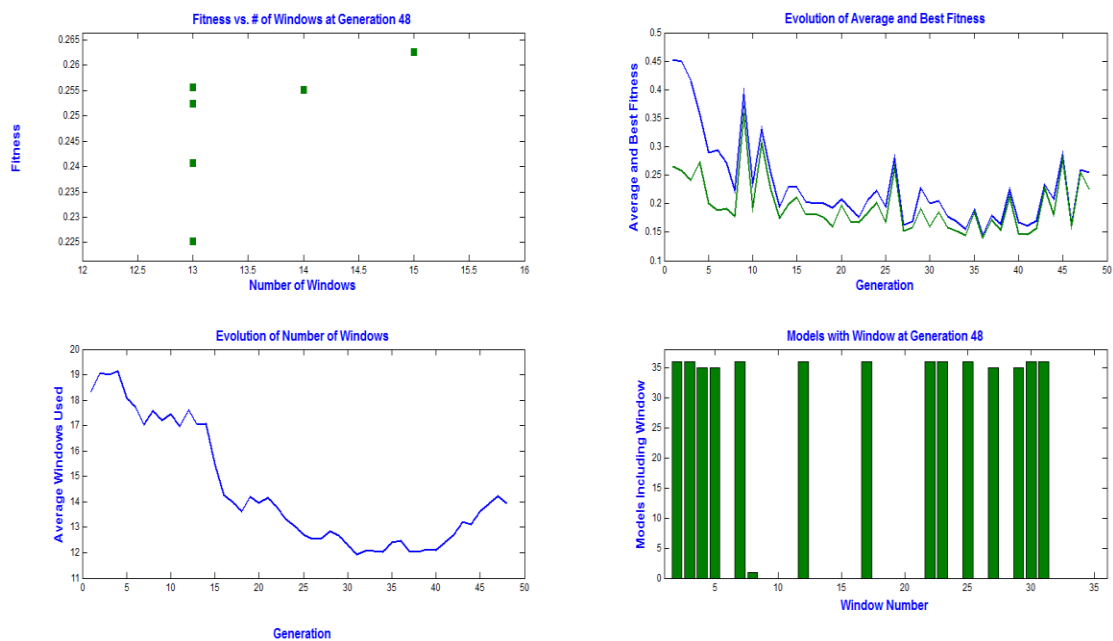

**Supplementary Figure S1.** Parameters involved in GA-PLS model for FVR

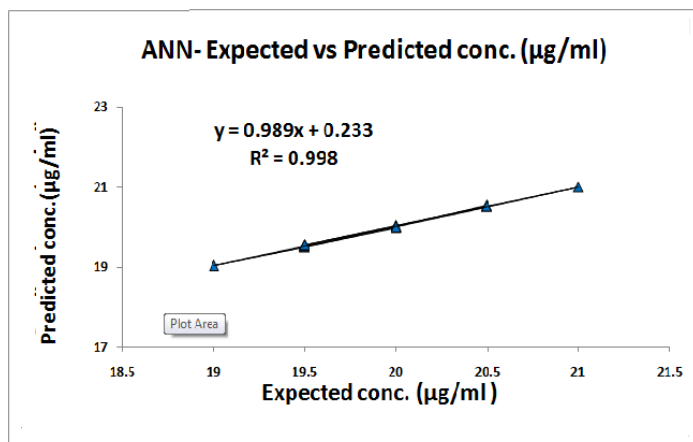

**(A)**

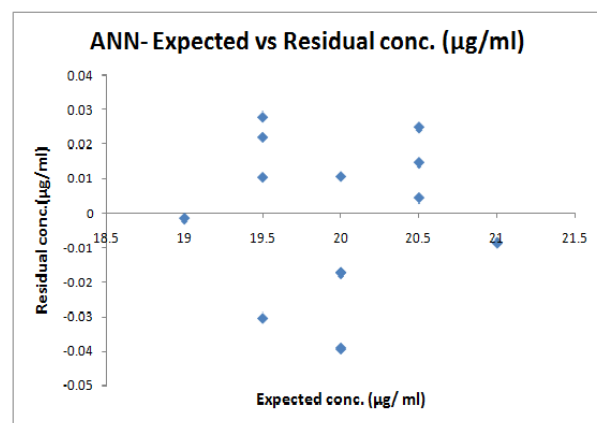

**(B)**

**Supplementary Figure S2.** Plot of actual FVR concentration versus **(A)** predicted concentrations, **(B)** residual concentrations in ANN model
